# Supplementary material for: Synthesis, characterization, two-photon absorption, and optical limiting properties of triphenylamine-based dendrimers
Source: Royal Society of Chemistry journal article supplement (doi:10.1039/b9nj00393b), 2009-01-01
Supplement: b9nj00393b.pdf [file b9nj00393b.pdf]

## Supporting information for

# Synthesis, Characterization, Two-Photon Absorption, and Optical Limiting Properties of Triphenylamine-based Dendrimers

Bin Xu,<sup>a</sup> Honghua Fang,<sup>b</sup> Feipeng Chen,<sup>a</sup> Hongguang Lu,<sup>a</sup> Jiating He,<sup>a</sup> Yaowen Li,<sup>a</sup>  
Qidai chen,<sup>b</sup> Hongbo Sun,<sup>\*b</sup> and Wenjing Tian<sup>\*a</sup>

<sup>a</sup> *State Key Laboratory of Supramolecular Structure and Materials, Jilin University,  
2699 Qianjin Avenue, Changchun 130012 P. R. China.*

<sup>b</sup> *State Key Laboratory on Integrated Optoelectronics, Jilin University, 2699 Qianjin  
Avenue, Changchun 130012 P. R. China.*

## MALDI-TOF MS data for dendrimers

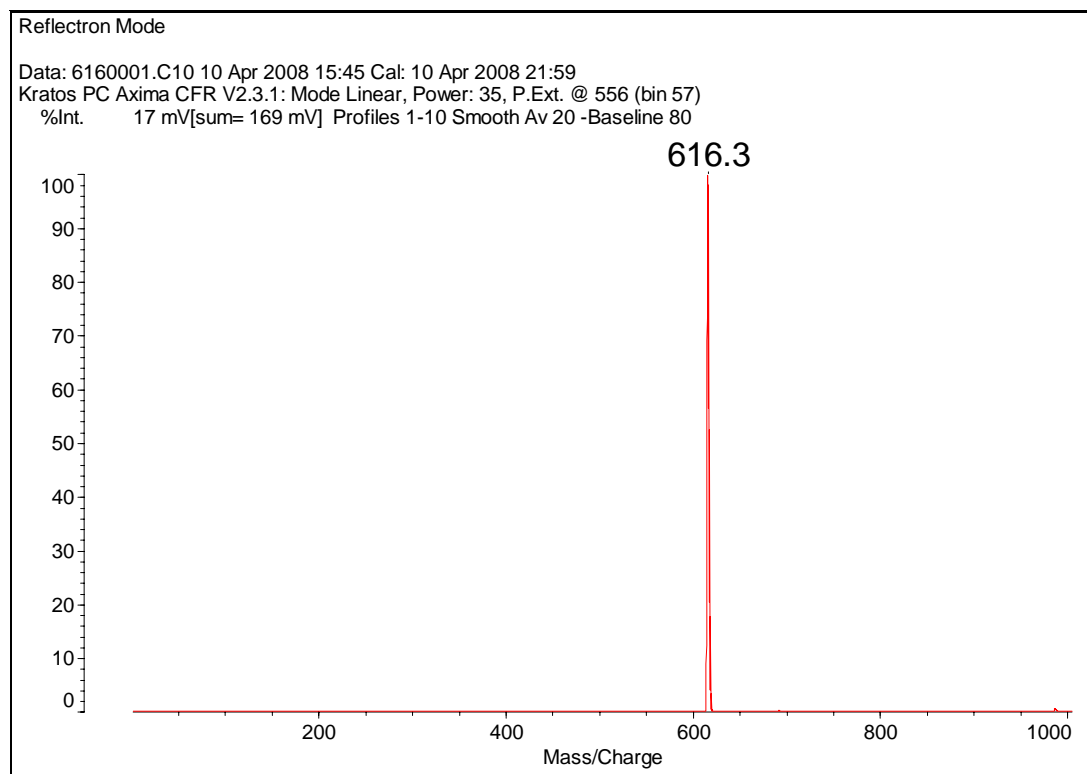

**Figure S1.** MALDI-TOF mass spectrum of Ph-G0

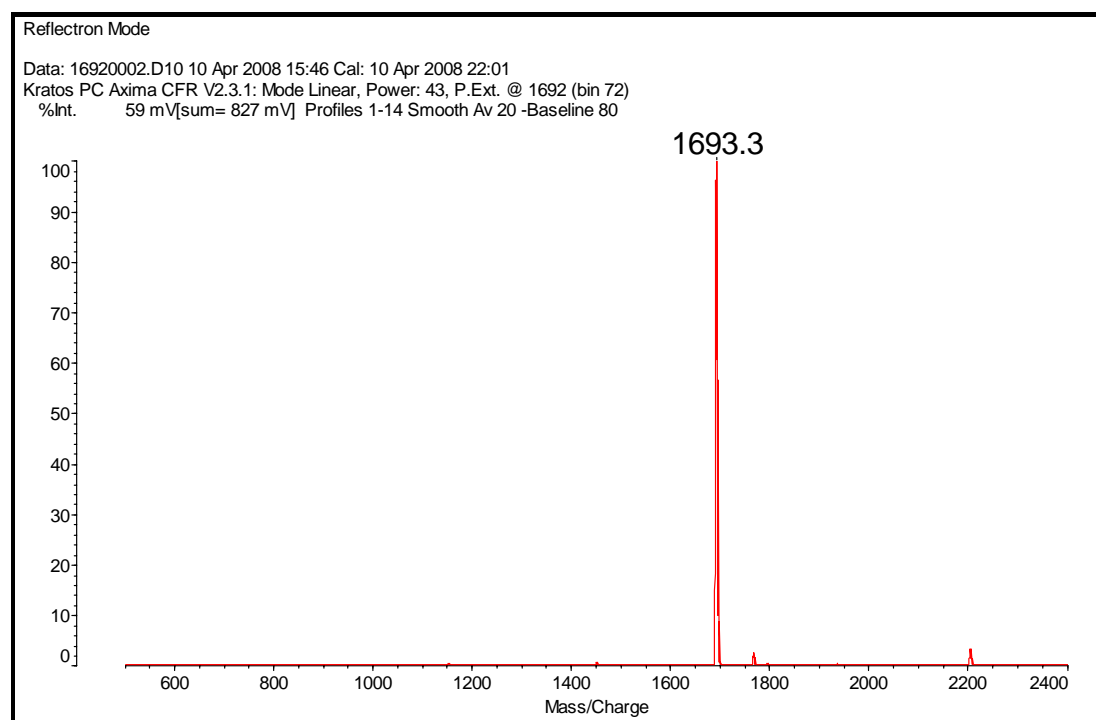

**Figure S2.** MALDI-TOF mass spectrum of Ph-G1

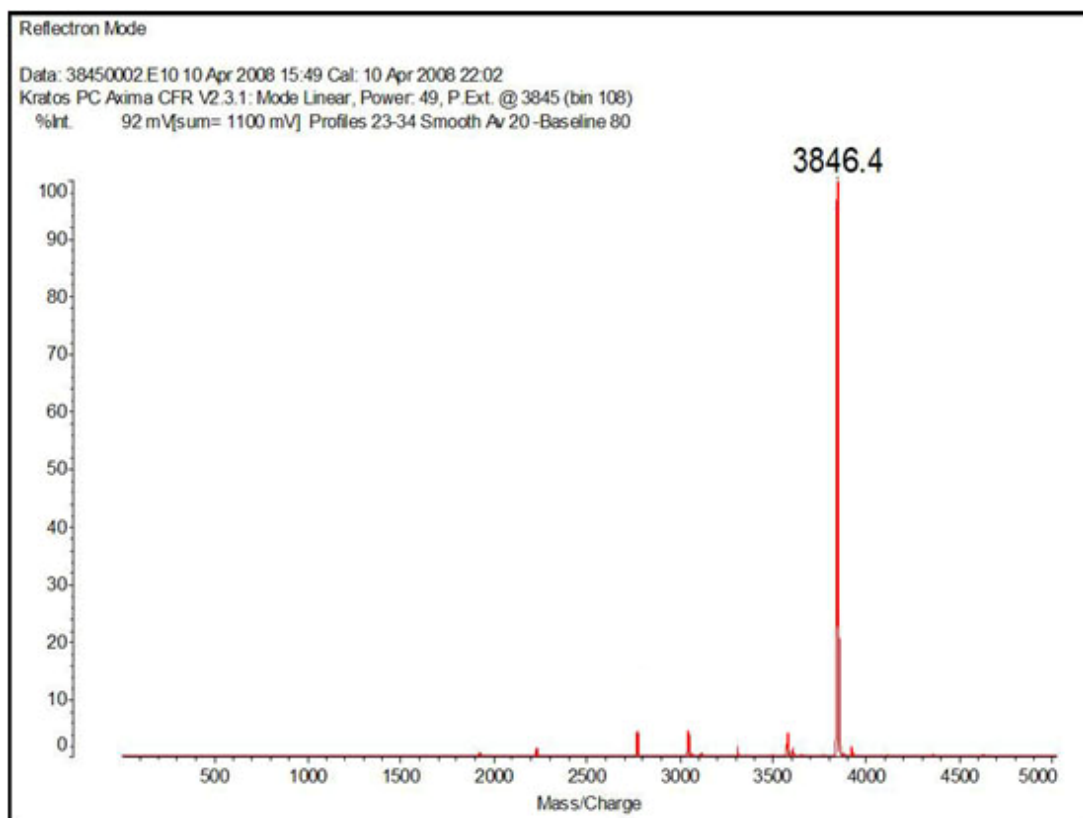

**Figure S3.** MALDI-TOF mass spectrum of Ph-G2
